# Supplementary material
Source: PubMed Central journal article supplement (PMC5354980)
Supplement: NIHMS827103-supplement-1.pdf [file NIHMS827103-supplement-1.pdf]

**Supplemental Table 1: Antibody Suppliers and Catalog Numbers**

| Target Protein                       | Antibody   |                          |
|--------------------------------------|------------|--------------------------|
|                                      | Catalog #  | Supplier                 |
| <b>Immunoblot</b>                    |            |                          |
| Actin                                | sc-1616    | Santa Cruz Biotechnology |
| MERTK                                | ab52968    | Abcam                    |
| phospho-MERTK (Tyr749/Tyr753/Tyr754) | N/A        | Phosphosolutions         |
| STAT6                                | 9362       | Cell Signaling           |
| phospho-STAT6 (Tyr641)               | 9364       | Cell Signaling           |
| AKT                                  | 9272       | Cell Signaling           |
| phospho-AKT (Ser473)                 | 9271       | Cell Signaling           |
| p44/42-MAPK                          | 9102       | Cell Signaling           |
| phospho-p44/42-MAPK (Thr202/Tyr204)  | 9106       | Cell Signaling           |
| <b>Flow Cytometry</b>                |            |                          |
| human CD45+                          | 347464     | BD Fisher                |
| Sca-1 (Ly-6A/E)-FITC                 | 11-5981-82 | eBioscience              |
| CD127-PerCP-Cy5.5                    | 45-1271-80 | eBioscience              |
| CD34-eFluor660                       | 50-0341-80 | eBioscience              |
| CD16/32                              | 12-0161-81 | eBioscience              |
| c-kit-PE-Cy7                         | 105814     | Biolegend                |
| Fli2/Fli3-PE                         | 553842     | BD Biosciences           |
| Lineage antibody cocktail-V450       | 51-9006957 | BD Biosciences           |

**Supplemental Table 2: Cell Cycle Profiles in Acute Leukemia Cell Lines Treated with UNC2025.** Mean values, standard errors, and p values compared to vehicle treatment from 3 independent experiments are shown. (NS=Not Significant, \*p<0.05, \*\*p<0.01, \*\*\*p<0.001, \*\*\*\*p<0.0001)

| Cell Line & Treatment Time | UNC2025 | G0/G1 Phase     |         | S Phase         |         | G2/M Phase      |         | Polyploid       |         |
|----------------------------|---------|-----------------|---------|-----------------|---------|-----------------|---------|-----------------|---------|
|                            |         | % Cycling Cells | p value | % Cycling Cells | p value | % Cycling Cells | p value | % Cycling Cells | p value |
| 697 x6 hrs                 | 0 nM    | 52.2 +/- 2.11   | ---     | 30.1 +/- 2.28   | ---     | 17.7 +/- 2.09   | ---     | ---             |         |
|                            | 50 nM   | 46.3 +/- 2.27   | NS      | 36.5 +/- 5.00   | NS      | 17.9 +/- 4.14   | NS      |                 |         |
|                            | 100 nM  | 44.8 +/- 2.74   | NS      | 36.2 +/- 3.06   | NS      | 19.0 +/- 2.65   | NS      |                 |         |
|                            | 200 nM  | 34.2 +/- 2.37   | *       | 36.8 +/- 1.87   | NS      | 29.0 +/- 4.09   | NS      |                 |         |
|                            | 300 nM  | 33.8 +/- 2.54   | **      | 36.8 +/- 2.73   | NS      | 29.4 +/- 4.48   | NS      |                 |         |
| 697 x24 hrs                | 0 nM    | 39.6 +/- 2.02   | ---     | 45.0 +/- 2.95   | ---     | 15.4 +/- 1.31   | ---     | ---             |         |
|                            | 50 nM   | 42.1 +/- 1.65   | NS      | 42.5 +/- 2.01   | NS      | 15.4 +/- .8     | NS      |                 |         |
|                            | 100 nM  | 49.2 +/- 2.04   | NS      | 37.8 +/- 1.06   | NS      | 13.1 +/- 1.55   | NS      |                 |         |
|                            | 200 nM  | 20.5 +/- 11.06  | *       | 17.9 +/- 1.27   | ****    | 61.7 +/- 10.49  | ****    |                 |         |
|                            | 300 nM  | 8.2 +/- 0.66    | ***     | 18.7 +/- 1.32   | ****    | 73.1 +/- 1.01   | ****    |                 |         |
| 697 x48 hrs                | 0 nM    | 43.0 +/- 2.17   | ---     | 39.7 +/- 1.05   | ---     | 17.2 +/- 1.02   | ---     | ---             |         |
|                            | 50 nM   | 43.8 +/- 1.76   | NS      | 39.9 +/- 1.16   | NS      | 16.3 +/- 1.35   | NS      |                 |         |
|                            | 100 nM  | 45.0 +/- 1.73   | NS      | 37.9 +/- 1.33   | NS      | 17.1 +/- 0.91   | NS      |                 |         |
|                            | 200 nM  | 28.7 +/- 8.78   | NS      | 10.0 +/- 2.53   | ****    | 61.3 +/- 9.78   | ***     |                 |         |
|                            | 300 nM  | 16.3 +/- 6.20   | *       | 18.3 +/- 4.07   | ***     | 65.4 +/- 5.69   | ***     |                 |         |
| REH x6 hrs                 | 0 nM    | 47.9 +/- 1.28   | ---     | 37.6 +/- 2.36   | ---     | 14.6 +/- 1.72   | ---     | ---             |         |
|                            | 50 nM   | 46.1 +/- 1.60   | NS      | 39.3 +/- 2.47   | NS      | 14.6 +/- 2.04   | NS      |                 |         |
|                            | 100 nM  | 46.7 +/- 1.15   | NS      | 36.5 +/- 2.34   | NS      | 16.8 +/- 2.44   | NS      |                 |         |
|                            | 200 nM  | 32.2 +/- 2.19   | ***     | 39.5 +/- 1.21   | NS      | 28.3 +/- 3.42   | *       |                 |         |
|                            | 300 nM  | 27.9 +/- 1.28   | ****    | 41.8 +/- 0.93   | NS      | 30.4 +/- 2.19   | **      |                 |         |
| REH x24 hrs                | 0 nM    | 46.9 +/- 2.31   | ---     | 37.8 +/- 3.12   | ---     | 15.3 +/- 0.78   | ---     | ---             |         |
|                            | 50 nM   | 47.8 +/- 2.05   | NS      | 37.6 +/- 2.87   | NS      | 14.6 +/- 0.75   | NS      |                 |         |
|                            | 100 nM  | 48.9 +/- 2.14   | NS      | 37.1 +/- 3.16   | NS      | 14.0 +/- 0.94   | NS      |                 |         |
|                            | 200 nM  | 26.5 +/- 5.43   | **      | 20.7 +/- 3.32   | **      | 52.8 +/- 8.30   | ****    |                 |         |
|                            | 300 nM  | 5.0 +/- 0.70    | ****    | 10.2 +/- 2.18   | ****    | 84.8 +/- 2.54   | ****    |                 |         |
| REH x48 hrs                | 0 nM    | 48.5 +/- 0.38   | ---     | 37.0 +/- 0.64   | ---     | 14.5 +/- 0.15   | ---     | ---             |         |
|                            | 50 nM   | 48.9 +/- 0.62   | NS      | 36.1 +/- 0.46   | NS      | 15.0 +/- 0.22   | NS      |                 |         |
|                            | 100 nM  | 50.3 +/- 0.61   | NS      | 35.0 +/- 1.06   | NS      | 14.7 +/- 1.07   | NS      |                 |         |
|                            | 200 nM  | 34.4 +/- 6.58   | *       | 14.9 +/- 4.24   | ****    | 50.7 +/- 9.92   | ***     |                 |         |
|                            | 300 nM  | 3.7 +/- 0.26    | ****    | 2.4 +/- 0.37    | ****    | 93.9 +/- 1.79   | ****    |                 |         |
| Jurkat x6 hrs              | 0 nM    | 48.8 +/- 1.68   | ---     | 30.8 +/- 4.89   | ---     | 20.3 +/- 3.24   | N/A     | 0.1 +/- 0.03    | ---     |
|                            | 50 nM   | 47.6 +/- 1.47   | NS      | 30.5 +/- 4.73   | NS      | 21.7 +/- 3.40   | NS      | 0.1 +/- 0.03    | NS      |
|                            | 100 nM  | 43.1 +/- 2.93   | NS      | 33.3 +/- 3.30   | NS      | 23.5 +/- 2.82   | NS      | 0.1 +/- 0.02    | NS      |
|                            | 200 nM  | 28.8 +/- 0.44   | ****    | 31.3 +/- 4.69   | NS      | 39.8 +/- 5.23   | *       | 0.1 +/- 0.03    | NS      |
|                            | 300 nM  | 25.4 +/- 1.23   | ****    | 32.1 +/- 4.17   | NS      | 42.5 +/- 5.42   | *       | 0.1 +/- 0.03    | NS      |
| Jurkat x24 hrs             | 0 nM    | 50.1 +/- 1.63   | ---     | 29.9 +/- 1.59   | ---     | 19.9 +/- 2.30   | N/A     | 0.2 +/- 0.04    | ---     |
|                            | 50 nM   | 49.2 +/- 1.57   | NS      | 29.8 +/- 1.55   | NS      | 20.6 +/- 2.43   | NS      | 0.3 +/- 0.05    | NS      |
|                            | 100 nM  | 48.0 +/- 1.77   | NS      | 28.7 +/- 1.29   | NS      | 22.3 +/- 2.22   | NS      | 0.9 +/- 0.15    | NS      |
|                            | 200 nM  | 28.3 +/- 8.22   | ***     | 12.8 +/- 2.81   | ****    | 38.7 +/- 2.68   | **      | 20.2 +/- 4.30   | ***     |
|                            | 300 nM  | 4.2 +/- 1.15    | ****    | 4.2 +/- 0.27    | ****    | 55.0 +/- 3.71   | ****    | 36.5 +/- 4.10   | ****    |
| Jurkat x48 hrs             | 0 nM    | 53.1 +/- 0.05   | ---     | 32.5 +/- 2.24   | ---     | 14.0 +/- 1.26   | N/A     | 0.3 +/- 0.06    | ---     |
|                            | 50 nM   | 55.2 +/- 0.86   | NS      | 30.9 +/- 1.83   | NS      | 13.6 +/- 1.48   | NS      | 0.3 +/- 0.05    | NS      |
|                            | 100 nM  | 53.1 +/- 1.12   | NS      | 31.7 +/- 2.27   | NS      | 14.3 +/- 1.84   | NS      | 0.9 +/- 0.11    | NS      |
|                            | 200 nM  | 28.8 +/- 7.96   | **      | 18.3 +/- 2.86   | **      | 32.0 +/- 3.28   | NS      | 20.9 +/- 6.48   | NS      |
|                            | 300 nM  | 8.0 +/- 3.79    | ****    | 11.3 +/- 0.81   | ***     | 30.2 +/- 10.43  | NS      | 50.5 +/- 15.12  | **      |
| Kasumi-1 x6 hrs            | 0 nM    | 63.3 +/- 0.61   | ---     | 23.9 +/- 1.20   | ---     | 12.8 +/- 0.65   | ---     | ---             |         |
|                            | 50 nM   | 66.1 +/- 0.30   | NS      | 21.1 +/- 0.35   | NS      | 12.8 +/- 0.61   | NS      |                 |         |
|                            | 100 nM  | 66.1 +/- 0.96   | NS      | 20.7 +/- 0.88   | NS      | 13.2 +/- 0.43   | NS      |                 |         |
|                            | 200 nM  | 61.4 +/- 1.10   | NS      | 22.2 +/- 1.68   | NS      | 16.3 +/- 0.74   | **      |                 |         |
|                            | 300 nM  | 60.1 +/- 1.68   | NS      | 23.3 +/- 1.57   | NS      | 16.7 +/- 0.38   | **      |                 |         |
| Kasumi-1 x24 hrs           | 0 nM    | 64.0 +/- 2.86   | ---     | 24.2 +/- 1.97   | ---     | 11.9 +/- 0.62   | ---     | ---             |         |
|                            | 50 nM   | 67.0 +/- 0.87   | NS      | 22.7 +/- 0.93   | NS      | 10.3 +/- 0.52   | NS      |                 |         |
|                            | 100 nM  | 71.8 +/- 0.31   | NS      | 18.4 +/- 0.38   | *       | 9.8 +/- 0.41    | NS      |                 |         |
|                            | 200 nM  | 61.2 +/- 3.30   | NS      | 20.5 +/- 0.93   | NS      | 18.3 +/- 1.38   | ***     |                 |         |
|                            | 300 nM  | 60.8 +/- 2.93   | NS      | 18.7 +/- 1.18   | *       | 20.6 +/- 0.72   | ****    |                 |         |
| Kasumi-1 x48 hrs           | 0 nM    | 67.5 +/- 0.94   | ---     | 20.5 +/- 1.37   | ---     | 12.1 +/- 0.56   | ---     | ---             |         |
|                            | 50 nM   | 69.0 +/- 0.46   | NS      | 19.3 +/- 0.87   | NS      | 11.8 +/- 0.56   | NS      |                 |         |
|                            | 100 nM  | 71.8 +/- 0.82   | NS      | 17.5 +/- 0.83   | NS      | 10.6 +/- 0.63   | NS      |                 |         |
|                            | 200 nM  | 63.7 +/- 3.33   | NS      | 21.8 +/- 1.24   | NS      | 14.5 +/- 1.69   | NS      |                 |         |
|                            | 300 nM  | 56.0 +/- 1.71   | **      | 28.1 +/- 1.36   | *       | 16.0 +/- 1.20   | NS      |                 |         |
| NOMO-1 x6 hrs              | 0 nM    | 46.5 +/- 1.03   | ---     | 29.5 +/- 1.56   | ---     | 23.8 +/- 1.94   | ---     | 0.2 +/- 0.10    | ---     |
|                            | 50 nM   | 48.5 +/- 1.93   | NS      | 31.1 +/- 2.03   | NS      | 20.2 +/- 2.80   | NS      | 0.2 +/- 0.10    | NS      |
|                            | 100 nM  | 45.9 +/- 0.84   | NS      | 29.6 +/- 1.49   | NS      | 24.4 +/- 1.21   | NS      | 0.1 +/- 0.02    | NS      |
|                            | 200 nM  | 31.1 +/- 2.97   | ***     | 31.1 +/- 1.28   | NS      | 37.8 +/- 3.19   | *       | 0.1 +/- 0.05    | NS      |
|                            | 300 nM  | 28.9 +/- 1.72   | ***     | 30.4 +/- 1.47   | NS      | 40.6 +/- 3.16   | **      | 0.1 +/- 0.06    | NS      |
| NOMO-1 x24 hrs             | 0 nM    | 48.8 +/- 0.56   | ---     | 26.5 +/- 0.95   | ---     | 24.0 +/- 0.66   | ---     | 0.7 +/- 0.01    | ---     |
|                            | 50 nM   | 49.5 +/- 0.35   | NS      | 26.6 +/- 0.86   | NS      | 23.1 +/- 0.44   | NS      | 0.8 +/- 0.04    | NS      |
|                            | 100 nM  | 49.0 +/- 0.57   | NS      | 25.2 +/- 1.59   | NS      | 24.6 +/- 1.10   | NS      | 1.2 +/- 0.04    | NS      |
|                            | 200 nM  | 24.3 +/- 5.65   | ****    | 13.2 +/- 2.30   | ****    | 47.2 +/- 3.42   | ****    | 15.3 +/- 2.45   | ****    |
|                            | 300 nM  | 11.6 +/- 0.88   | ****    | 9.2 +/- 0.63    | ****    | 59.5 +/- 0.63   | ****    | 19.8 +/- 0.65   | ****    |
| NOMO-1 x48 hrs             | 0 nM    | 52.8 +/- 0.07   | ---     | 27.2 +/- 1.34   | ---     | 19.5 +/- 0.94   | ---     | 0.5 +/- 0.30    | ---     |
|                            | 50 nM   | 51.7 +/- 0.66   | NS      | 26.9 +/- 1.29   | NS      | 20.7 +/- 0.79   | NS      | 0.7 +/- 0.47    | NS      |
|                            | 100 nM  | 51.7 +/- 0.16   | NS      | 26.1 +/- 0.57   | NS      | 21.4 +/- 0.16   | NS      | 0.8 +/- 0.50    | NS      |
|                            | 200 nM  | 37.3 +/- 6.23   | **      | 21.7 +/- 3.17   | NS      | 29.7 +/- 2.73   | NS      | 11.3 +/- 7.55   | NS      |
|                            | 300 nM  | 16.8 +/- 2.49   | ****    | 12.4 +/- 2.11   | ***     | 36.1 +/- 4.18   | **      | 34.7 +/- 10.22  | **      |

**Supplemental Table 3: Median Post-Treatment Survival in the 697 Minimal Residual Disease Model**

| Experiment # | Vehicle         |    | 50 mg/kg UNC2025 |    |         | 75 mg/kg UNC2025 |    |         |
|--------------|-----------------|----|------------------|----|---------|------------------|----|---------|
|              | Median Survival | n  | Median Survival  | n  | p value | Median Survival  | n  | p value |
| 1            | 28.5 days       | 6  | 32.5 days        | 4  | 0.0279  | 69.5 days        | 2  | 0.0346  |
| 2            | 24 days         | 15 |                  |    |         | 64 days          | 14 | <0.0001 |
| 3            | 26 days         | 10 | 34 days          | 11 | <0.0001 | 70 days          | 9  | <0.0001 |

**Supplemental Table 4: Brain and Plasma Concentrations in Swiss Albino Mice Following Administration of a Single Oral Dose of UNC2025.** Blood samples and brains were collected from male Swiss albino mice after administration of a single dose of UNC2025 by oral gavage. Plasma and brain homogenates were prepared and UNC2025 concentrations were determined by LC-MS/MS. Pharmacokinetic analysis was performed using Phoenix WinNonlin Enterprise v6.3 software.

| Dose (mg/kg) | Cmax         |                | Brain/Plasma Ratio | AUC             |                   | Brain/Plasma Ratio |
|--------------|--------------|----------------|--------------------|-----------------|-------------------|--------------------|
|              | Brain (ng/g) | Plasma (ng/mL) |                    | Brain (hr*ng/g) | Plasma (hr*ng/mL) |                    |
| 30           | 272          | 1718           | 0.16               | 1328            | 8833              | 0.15               |
| 100          | 643          | 2868           | 0.22               | 6826            | 25170             | 0.27               |

**Supplemental Table 5: Median Post-Treatment Survival in the 697 Existent Disease Model**

| Experiment # | Pre-Treatment Disease Burden (photons/sec) | Vehicle         |    | 75 mg/kg UNC2025 |    |         |
|--------------|--------------------------------------------|-----------------|----|------------------|----|---------|
|              |                                            | Median Survival | n  | Median Survival  | n  | p value |
| 1            | $0.67 \times 10^6$                         | 16 days         | 5  | 34 days          | 5  | 0.0015  |
| 2            | $0.75 \times 10^6$                         | 22 days         | 9  | 60 days          | 9  | <0.0001 |
| 3            | $1.11 \times 10^6$                         | 15 days         | 9  | 51 days          | 4  | 0.0007  |
| 4            | $1.21 \times 10^6$                         | 18 days         | 8  | 32.5 days        | 6  | 0.0005  |
| 5            | $4.88 \times 10^6$                         | 13 days         | 9  | 42.5 days        | 4  | 0.0020  |
| 6            | $5.81 \times 10^6$                         | 13.5 days       | 10 | 31 days          | 9  | <0.0001 |
| 7            | $11.29 \times 10^6$                        | 11 days         | 9  | 36 days          | 5  | 0.0007  |
| 8            | $195 \times 10^6$                          | 5.5 days        | 10 | 20 days          | 10 | <0.0001 |
| 9            | $214 \times 10^6$                          | 6 days          | 10 | 14.5 days        | 9  | <0.0001 |
| 10           | $213 \times 10^6$                          | 5 days          | 8  | 12.5 days        | 8  | <0.0001 |
